# Supplementary material
Source: ML conference proceedings conference paper supplement (https://proceedings.neurips.cc/paper_files/paper/2020/hash/821fa74b50ba3f7cba1e6c53e8fa6845-Abstract.html)
Supplement: Supplementary file [file 821fa74b50ba3f7cba1e6c53e8fa6845-Supplemental.pdf]

---

# Self-paced Contrastive Learning with Hybrid Memory for Domain Adaptive Object Re-ID

## Supplementary Material

---

Yixiao Ge Feng Zhu Dapeng Chen Rui Zhao Hongsheng Li  
Multimedia Laboratory  
The Chinese University of Hong Kong  
{yxge@link,hsli@ee}.cuhk.edu.hk dapengchenxjtu@gmail.com

### A Algorithm Details

---

#### Algorithm 1 Self-paced contrastive learning algorithm on domain adaptive object re-ID

---

**Require:** Source-domain labeled data  $\mathbb{X}^s$  and target-domain unlabeled data  $\mathbb{X}^t$ ;  
**Require:** Initialize the backbone encoder  $f_\theta$  with ImageNet-pretrained ResNet-50;  
**Require:** Initialize the hybrid memory with features extracted by  $f_\theta$ ;  
**Require:** Temperature  $\tau$  for Eq. (1), momentum  $m^s$  for Eq. (3), momentum  $m^t$  for Eq. (4);

```
for n in [1, num_epochs] do
  Group  $\mathbb{X}^t$  into  $\mathbb{X}_c^t$  and  $\mathbb{X}_o^t$  by clustering  $\{v\}$  from the hybrid memory with the independence Eq. (5) and compactness Eq. (6) criterion;
  Initialize the cluster centroids  $\{c\}$  with Eq. (2) in the hybrid memory;
  for each mini-batch  $\{x_i^s\} \subset \mathbb{X}^s, \{x_i^t\} \subset \mathbb{X}^t$  do
    1: Encode features  $\{f_i^s\}, \{f_i^t\}$  for  $\{x_i^s\}, \{x_i^t\}$  with  $f_\theta$ ;
    2: Compute the unified contrastive loss with  $\{f_i^s\}, \{f_i^t\}$  by Eq. (1) and update the encoder  $f_\theta$  by back-propagation;
    3: Update source-domain related class centroids  $\{w\}$  in the hybrid memory with  $\{f_i^s\}$  and momentum  $m^s$  (Eq. (3));
    4: Update target-domain related instance features  $\{v\}$  in the hybrid memory with  $\{f_i^t\}$  and momentum  $m^t$  (Eq. (4));
    5: Update target-domain related cluster centroids  $\{c\}$  with updated  $\{v\}$  in the hybrid memory (Eq. (2));
  end for
end for
```

---

---

#### Algorithm 2 Self-paced contrastive learning algorithm on unsupervised object re-ID

---

**Require:** Unlabeled data  $\mathbb{X}^t$ ;  
**Require:** Initialize the backbone encoder  $f_\theta$  with ImageNet-pretrained ResNet-50;  
**Require:** Initialize the hybrid memory with features extracted by  $f_\theta$ ;  
**Require:** Temperature  $\tau$  for Eq. (1), momentum  $m^t$  for Eq. (4);

```
for n in [1, num_epochs] do
  Group  $\mathbb{X}^t$  into  $\mathbb{X}_c^t$  and  $\mathbb{X}_o^t$  by clustering  $\{v\}$  from the hybrid memory with the independence Eq. (5) and compactness Eq. (6) criterion;
  Initialize the cluster centroids  $\{c\}$  with Eq. (2) in the hybrid memory;
  for each mini-batch  $\{x_i^t\} \subset \mathbb{X}^t$  do
    1: Encode features  $\{f_i^t\}$  for  $\{x_i^t\}$  with  $f_\theta$ ;
    2: Compute the unsupervised-version unified contrastive loss with  $\{f_i^t\}$  as below and update the encoder  $f_\theta$  by back-propagation;
      
$$\mathcal{L}_f = -\log \frac{\exp(\langle f, z^+ \rangle / \tau)}{\sum_{k=1}^{n_c^t} \exp(\langle f, c_k \rangle / \tau) + \sum_{k=1}^{n_o^t} \exp(\langle f, v_k \rangle / \tau)}$$

    3: Update instance features  $\{v\}$  in the hybrid memory with  $\{f_i^t\}$  and momentum  $m^t$  (Eq. (4));
    4: Update cluster centroids  $\{c\}$  with updated  $\{v\}$  in the hybrid memory (Eq. (2));
  end for
end for
```

---

### B More Discussions

**Comparison with ECN [62, 63].** There is an existing work, ECN [62] with its extension version [63], which also adopts a feature memory for the domain adaptive person re-ID task. Comparison results in Table 2 demonstrate the superiority of our proposed method, and there are three main

---

\*Dapeng Chen is the corresponding author.

differences between our method and ECN. (1) Our proposed hybrid memory dynamically provides all the source-domain class-level, target-domain cluster-level and un-clustered instance-level supervisory signals, while the memory used in ECN only provides instance-level supervisions on the target domain. (2) We use unified training of source classes, target clusters and target outliers, while ECN uses multi-task learning and treats source and target classes separately. (3) We propose a self-paced learning strategy to gradually refine the learning targets on both clusters and un-clustered instances, while ECN adopts noisy  $k$ -nearest neighbors as learning targets for all the samples without consideration of uneven density in the latent space.

## C More Implementation Details

We implement our framework in PyTorch [35] and adopt 4 GTX-1080TI GPUs for training<sup>†</sup>. The domain adaptation task with both source-domain and target-domain data takes  $\sim 3$  hours for training, and the unsupervised learning task with only target-domain data takes  $\sim 2$  hours for training on Market-1501 and PersonX datasets. When training on MSMT17, VehicleID, VeRi-776 and VehicleX datasets, time needs to be doubled due to over  $2\times$  images in the training set.

### C.1 Network Optimization

We adopt an ImageNet [7]-pretrained ResNet-50 [18] up to the global average pooling layer, followed by a 1D BatchNorm layer and an  $L_2$ -normalization layer, as the backbone for the encoder  $f_\theta$ . Domain-specific BNs [3] are used in  $f_\theta$  for narrowing domain gaps. Adam optimizer is adopted to optimize  $f_\theta$  with a weight decay of 0.0005. The initial learning rate is set to 0.00035 and is decreased to 1/10 of its previous value every 20 epochs in the total 50 epochs. The temperature  $\tau$  in Eq. (1) is empirically set as 0.05. The hybrid memory is initialized by extracting the whole training set with the ImageNet-pretrained encoder  $f_\theta$ , and is then dynamically updated with  $m^s = m^t = 0.2$  in Eq. (3)&(4) at each iteration.

### C.2 Training Data Organization

During training, each mini-batch contains 64 source-domain images of 16 ground-truth classes (4 images for each class) and 64 target-domain images of *at least* 16 pseudo classes, where target-domain clusters and un-clustered instances are all treated as independent pseudo classes (4 images for each cluster or 1 image for each un-clustered instance). The person images are resized to  $256 \times 128$  and the vehicle images are resized to  $224 \times 224$ . Random data augmentation is applied to each image before it is fed into the network, including randomly flipping, cropping and erasing [61].

### C.3 Target-domain Clustering

Following the clustering-based UDA methods [11, 10, 38], we use DBSCAN [9] and Jaccard distance [60] with  $k$ -reciprocal nearest neighbors for clustering before each epoch, where  $k = 30$ . For DBSCAN, the maximum distance between neighbors is set as  $d = 0.6$  and the minimal number of neighbors for a dense point is set as 4. In our proposed self-paced learning strategy described in Section 3.2, we tune the value of  $d$  to loosen or tighten the clustering criterion. Specifically, we adopt  $d = 0.62$  to form the looser criterion and  $d = 0.58$  for the tighter criterion, denoted as  $\Delta d = 0.02$ . The constant threshold  $\alpha$  for identifying independent clusters is defined by the top-90%  $\mathcal{R}_{\text{indep}}$  before the first epoch and remains the same for all the training process. The dynamic threshold  $\beta$  for identifying compact clusters is defined by the maximum  $\mathcal{R}_{\text{comp}}$  in each cluster on-the-fly, *i.e.*, we preserve the most compact points in each cluster.

## D Additional Experimental Results

### D.1 Performance with IBN-ResNet [34]

Instance-batch normalization (IBN) [34] has been proved effective in object re-ID methods in either unsupervised [11] or supervised [30] learning tasks. We evaluate our framework with IBN-ResNet as

<sup>†</sup><https://github.com/yxgeee/SpCL>

Table 6: Comparison of different backbones in our framework, *i.e.*, ResNet-50 and IBN-ResNet.

| Source      | Target      | Ours w/ ResNet-50 |             |             |             | Ours w/ IBN-ResNet |             |             |             |
|-------------|-------------|-------------------|-------------|-------------|-------------|--------------------|-------------|-------------|-------------|
|             |             | mAP               | top-1       | top-5       | top-10      | mAP                | top-1       | top-5       | top-10      |
| Market-1501 | MSMT17      | 26.8              | 53.7        | 65.0        | 69.8        | <b>31.0</b>        | <b>58.1</b> | <b>69.6</b> | <b>74.1</b> |
| MSMT17      | Market-1501 | 77.5              | 89.7        | 96.1        | 97.6        | <b>79.9</b>        | <b>92.0</b> | <b>97.1</b> | <b>98.1</b> |
| PersonX     | Market-1501 | 73.8              | 88.0        | 95.3        | 96.9        | <b>77.9</b>        | <b>90.5</b> | <b>96.1</b> | <b>97.7</b> |
| PersonX     | MSMT17      | 22.7              | 47.7        | 60.0        | 65.5        | <b>25.4</b>        | <b>50.6</b> | <b>63.3</b> | <b>68.3</b> |
| VehicleID   | VeRi-776    | <b>38.9</b>       | <b>80.4</b> | <b>86.8</b> | <b>89.6</b> | 38.0               | 79.7        | 85.8        | 88.4        |
| VehicleX    | VeRi-776    | <b>38.9</b>       | <b>81.3</b> | <b>87.3</b> | <b>90.0</b> | 37.8               | 80.7        | 86.1        | 89.2        |
| None        | Market-1501 | 73.1              | 88.1        | 95.1        | 97.0        | <b>73.8</b>        | <b>88.4</b> | <b>95.3</b> | <b>97.3</b> |
| None        | MSMT17      | 19.1              | 42.3        | 55.6        | 61.2        | <b>24.0</b>        | <b>48.9</b> | <b>61.8</b> | <b>67.1</b> |
| None        | VeRi-776    | <b>36.9</b>       | <b>79.9</b> | <b>86.8</b> | <b>89.9</b> | 36.6               | 79.1        | 85.9        | 89.2        |

the backbone of the encoder, which is formed by replacing all BN layers in ResNet-50 [18] with IBN layers. As shown in Table 6, the performance can be further improved with IBN-ResNet except for the vehicle datasets.

## D.2 Self-paced Learning Strategy on Other Clustering Algorithms

Table 7: Evaluate our framework over Agglomerative Clustering [1] algorithm. Experiments are conducted on the tasks of unsupervised person re-ID.

| Clustering                                              | Market-1501 |             |             |             |
|---------------------------------------------------------|-------------|-------------|-------------|-------------|
|                                                         | mAP         | top-1       | top-5       | top-10      |
| Agglomerative Clustering <i>w/o</i> self-paced strategy | 70.4        | 87.1        | 94.7        | 96.6        |
| Agglomerative Clustering <i>w/</i> self-paced strategy  | <b>75.2</b> | <b>89.7</b> | <b>95.8</b> | <b>97.5</b> |

In order to verify that our proposed self-paced learning strategy with cluster reliable criterion is still effective when creating pseudo labels with other clustering algorithms, we conduct experiments by replacing the original DBSCAN algorithm with Agglomerative Clustering [1] algorithm. As shown in Table 7, significant 4.8% mAP improvements can be observed when applying the self-paced learning strategy. What is interesting is that the final performance is even better than that on DBSCAN.

## D.3 Cluster Reliable Criterion *v.s.* HDBSCAN [2]

Table 8: Comparison between DBSCAN *w/* our cluster reliable criterion and HDBSCAN [2]. Experiments are conducted on the tasks of unsupervised person re-ID.

| Clustering                                      | Market-1501 |             |             |             | MSMT17      |             |             |             |
|-------------------------------------------------|-------------|-------------|-------------|-------------|-------------|-------------|-------------|-------------|
|                                                 | mAP         | top-1       | top-5       | top-10      | mAP         | top-1       | top-5       | top-10      |
| DBSCAN <i>w/</i> our cluster reliable criterion | <b>73.1</b> | <b>88.1</b> | <b>95.1</b> | <b>97.0</b> | <b>19.1</b> | <b>42.3</b> | <b>55.6</b> | <b>61.2</b> |
| HDBSCAN                                         | 71.7        | 87.7        | 95.0        | 96.3        | 15.7        | 39.2        | 51.3        | 56.7        |

The intuition of our cluster reliable criterion is to measure the stability of clusters by hierarchical structures, which shows similar motivation as HDBSCAN [2]. So we test HDBSCAN to replace our reliability criterion and observe 1.4%/3.4% mAP drops on unsupervised Market-1501/MSMT17 tasks (Table 8), which indicates that DBSCAN with our cluster reliability criterion is more suitable than HDBSCAN in the proposed framework.

## E Parameter Analysis

We tune the hyper-parameters on the task of MSMT17→Market-1501, and the chosen hyper-parameters are directly applied to all the other tasks.

### E.1 Temperature $\tau$ for Contrastive Loss

As demonstrated in Figure 4, our framework achieves the optimal performance when setting the temperature  $\tau$  as 0.05 in Eq. (1) on the task of MSMT17→Market-1501. One may find that the performance varies with different values of  $\tau$ , but note that all methods using temperature contrastive

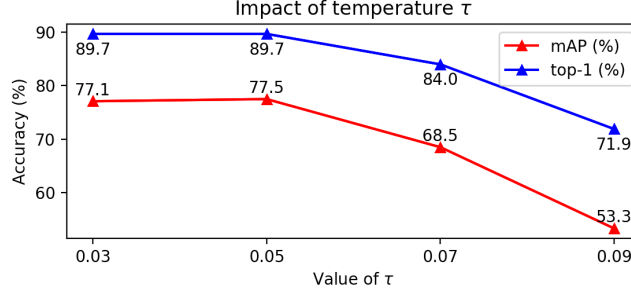

Figure 4: Performance of our framework with different values of temperature  $\tau$ .

function (e.g., [62, 63, 48, 17, 4, 33]) have similar effects on  $\tau$ . We set  $\tau = 0.05$  following [62, 63] and achieve the best performance using the same  $\tau = 0.05$  for 6 UDA tasks (Table 2) and 3 unsupervised tasks (Table 4), showing the robustness of  $\tau =$  fixed 0.05.

## E.2 Momentum Coefficients $m^s, m^t$ for Hybrid Memory

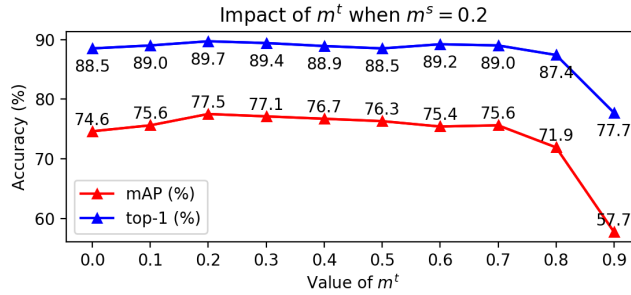

Figure 5: Performance of our framework with different values of  $m^t$  when  $m^s = 0.2$ .

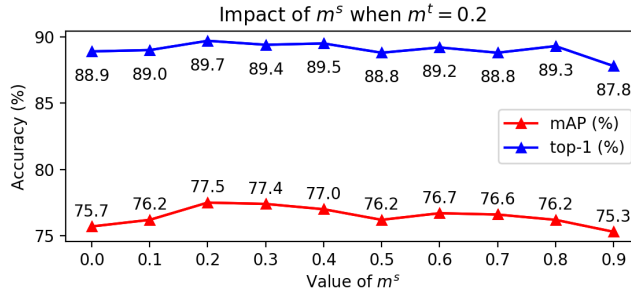

Figure 6: Performance of our framework with different values of  $m^s$  when  $m^t = 0.2$ .

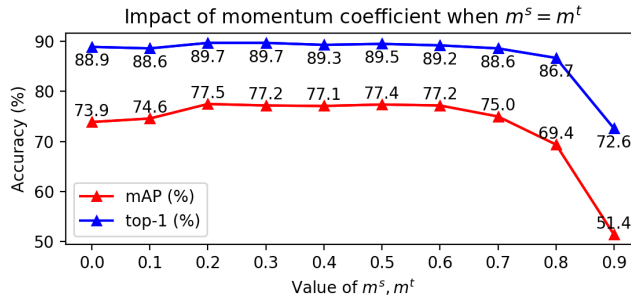

Figure 7: Performance of our framework with different values of  $m^s, m^t$  when  $m^s = m^t$ .

Our proposed hybrid memory simultaneously stores and updates the source-domain class centroids with momentum  $m^s$  in Eq. (3) and the target-domain instance features with momentum  $m^t$  in Eq. (4). We adopt  $m^s = m^t = 0.2$  in our experiments by tuning such hyper-parameter on the task of MSMT17→Market-1501.

We find that the value of  $m^t$  is critical to the optimal performance (Figure 5) while our framework is not sensitive to the value of  $m^s$  (Figure 6), so we adopt the same momentum coefficient on two domains for convenience, *i.e.*,  $m^s = m^t$ . Despite the value of  $m^t$  affects the final performance, the results of our framework are robust when  $m^t$  changes within a large range, *i.e.*,  $[0.2, 0.6]$  in Figure 7.

### E.3 Residual $\Delta d$ for Cluster Reliability Criterion

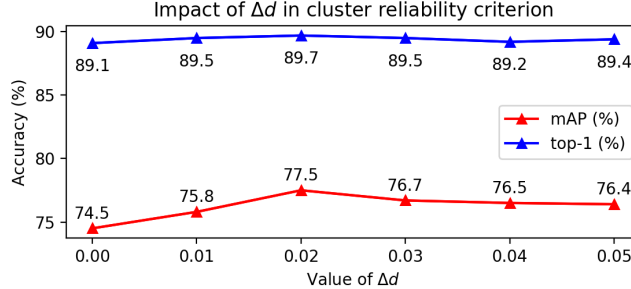

Figure 8: Performance of our framework with different values of  $\Delta d$  in the cluster reliability criterion.

As described in Section C.3, we tune the value of the maximum neighbor distance  $d$  with a residual  $\Delta d = 0.02$  to measure the cluster reliability in our self-paced learning strategy. As shown in Figure 8,  $\Delta d = 0.00$  can be thought of as removing the self-paced strategy from training, which is the same as “Ours *w/o*  $\mathcal{R}_{\text{comp}} \& \mathcal{R}_{\text{indep}}$ ” in Table 5. Our method could achieve similar performance when  $\Delta d$  changes within  $[0.02, 0.05]$ , which indicates that our proposed reliability criterion is not sensitive to the hyper-parameter  $\Delta d$ .
